# Supplementary material
Source: publisher site journal article supplement (https://www.dovepress.com/article/250076)
Supplement: Supplementary file 1 [file get_supplementary_file.php]

**Supplementary Material:**

**Table 1．**Linkage disequilibrium analyses of rs8028147, rs3743343, rs3743342, rs8025774, rs8031440, rs8031627,rs34643453 in the control group.

| D' | rs3743343 | rs3743342 | rs8025774 | rs8031440 | rs8031627 | rs34643453 |
| --- | --- | --- | --- | --- | --- | --- |
| rs8028147 | 0.103 | 0.082 | 0.071 | 0.085 | 0.079 | 0.016 |
| rs3743343 | - | 0.986 | 0.986 | 0.99 | 0.99 | 0.018 |
| rs3743342 | - | - | 0.995 | 0.995 | 0.995 | 0.027 |
| rs8025774 | - | - | - | 0.995 | 0.994 | 0.037 |
| rs8031440 | - | - | - | - | 1 | 0.034 |
| rs8031627 | - | - | - | - | - | 0.044 |

| r2 | rs3743343 | rs3743342 | rs8025774 | rs8031440 | rs8031627 | rs34643453 |
| --- | --- | --- | --- | --- | --- | --- |
| rs8028147 | 0.007 | 0.004 | 0.003 | 0.004 | 0.004 | 0 |
| rs3743343 | - | 0.387 | 0.379 | 0.39 | 0.38 | 0 |
| rs3743342 | - | - | 0.97 | 0.991 | 0.967 | 0 |
| rs8025774 | - | - | - | 0.97 | 0.985 | 0 |
| rs8031440 | - | - | - | - | 0.977 | 0 |
| rs8031627 | - | - | - | - | - | 0.001 |

**Table 2．**Linkage disequilibrium analyses of rs8028147, rs3743343, rs3743342, rs8025774, rs8031440, rs8031627,rs34643453 in the case group

| D' | rs3743343 | rs3743342 | rs8025774 | rs8031440 | rs8031627 | rs34643453 |
| --- | --- | --- | --- | --- | --- | --- |
| rs8028147 | 0.137 | 0.115 | 0.106 | 0.103 | 0.107 | 0.01 |
| rs3743343 | - | 0.981 | 0.984 | 0.984 | 0.984 | 0 |
| rs3743342 | - | - | 0.994 | 0.99 | 0.99 | 0.074 |
| rs8025774 | - | - | - | 1 | 1 | 0.066 |
| rs8031440 | - | - | - | - | 1 | 0.07 |
| rs8031627 | - | - | - | - | - | 0.06 |

| r2 | rs3743343 | rs3743342 | rs8025774 | rs8031440 | rs8031627 | rs34643453 |
| --- | --- | --- | --- | --- | --- | --- |
| rs8028147 | 0.012 | 0.01 | 0.008 | 0.008 | 0.008 | 0 |
| rs3743343 | - | 0.44 | 0.431 | 0.44 | 0.434 | 0 |
| rs3743342 | - | - | 0.961 | 0.973 | 0.959 | 0.002 |
| rs8025774 | - | - | - | 0.981 | 0.994 | 0.001 |
| rs8031440 | - | - | - | - | 0.986 | 0.002 |
| rs8031627 | - | - | - | - | - | 0.001 |
